# Supplementary material
Source: HighWire-hosted journal article supplement (http://www.qdcxjkg.com/highwire/filestream/114013/field_highwire_adjunct_files/0/ERJ-01335-2012_Disclosures.pdf)
Supplement: ERJ-01335-2012_Disclosures.pdf [file ERJ-01335-2012_Disclosures.pdf]

**K. Chin** has a grant from the Japanese Ministry of Education, Culture, Sports, Science and Technology (nos.20590921 and 22590860), and Respiratory Failure Research Group and Health science Research Grants (Comprehensive Research on Life-Style Related Diseases including Cardiovascular Diseases and Diabetes Mellitus) from the Ministry of Health, Labor and Welfare of Japan, and the Japan Vascular Disease Research Foundation. The Dept of Respiratory Care and Sleep Control Medicine is funded by endowments from Philips-Respironics, Teijin Pharma and Fukuda Denshi to Kyoto University.
